# Supplementary material for: Gut Microbial Metabolome and Dysbiosis in Neurodegenerative Diseases: Psychobiotics and Fecal Microbiota Transplantation as a Therapeutic Approach—A Comprehensive Narrative Review
Source: MDPI journal article supplement (doi:10.3390/ijms241713294), 2023-08-27
Supplement: s1 [file s1]

## Supplementary Material

Figure S1: Description of the main phyla and species altered in neurodegenerative diseases. Arrows represent increase and/or decrease compared to healthy controls, according to the literature.

| Phylum             | Dysbiosis in AD                       | Dysbiosis in PD                       | Dysbiosis in MS                  | Dysbiosis in ALS                   |
|--------------------|---------------------------------------|---------------------------------------|----------------------------------|------------------------------------|
| Firmicutes         | ↓ <i>Eubacterium Clostridium</i>      | ↑ Lachnospiraceae                     | ↓ <i>Faecalibacterium</i>        | ↓ <i>Megamonas</i>                 |
|                    | ↓ <i>Roseburia hominis</i>            | ↑ <i>Peptostreptococcaceae</i>        |                                  |                                    |
|                    | ↓ <i>Faecalibacterium prausnitzii</i> | ↑ ↓ <i>Clostridiaceae</i>             |                                  | ↓ <i>Butyrivibrio fibrisolvens</i> |
|                    | ↓ <i>Butyrivibrio</i>                 | ↑ ↓ <i>Tissierellaceae</i>            |                                  |                                    |
|                    |                                       | ↑ <i>Desulfotomaculum</i>             | ↑ <i>Ruminococcus</i>            | ↓ <i>Roseburia</i>                 |
|                    | ↑ <i>Clostridium</i>                  | ↑ <i>Planococcaceae</i>               |                                  |                                    |
|                    | ↑ <i>Bacillus subtilis</i>            | ↑ <i>Granulicatella</i>               |                                  | ↓ <i>Eubacterium rectale</i>       |
|                    | ↑ <i>Staphylococcus aureus</i>        | ↑ ↓ <i>Staphylococcaceae</i>          |                                  |                                    |
| Bacteroidetes      |                                       | ↑ ↓ <i>Roseburia</i>                  |                                  |                                    |
|                    |                                       | ↑ ↓ <i>Lachnospiraceae</i>            |                                  |                                    |
| Proteobacteria     | ↑ <i>Porphyromonas gingivalis</i>     | ↓ ↑ <i>Prevotellaceae</i>             | ↓ ↑ <i>Prevotellaceae</i>        | ↑ <i>Bacteroidetes</i>             |
|                    |                                       | ↓ ↑ <i>Paraprevotellaceae</i>         |                                  |                                    |
|                    | ↑ <i>Helicobacter pylori</i>          | ↑ <i>Helicobacter pylori</i>          |                                  |                                    |
|                    | ↑ <i>Escherichia coli</i>             |                                       |                                  |                                    |
|                    | ↑ <i>Escherichia-Shigella</i>         | ↑ <i>Burkholderiales</i>              |                                  |                                    |
| Actinobacteria     | ↑ <i>Salmonella Typhimurium</i>       | ↑ <i>Oxalobacteraceae</i>             |                                  |                                    |
|                    | ↑ <i>Pseudomonas fluorescens</i>      |                                       |                                  |                                    |
| Spirochaetae       |                                       | ↑ <i>Atopobium</i>                    |                                  |                                    |
|                    | ↓ <i>Actinobacteria</i>               | ↑ <i>Bifidobacterium pseudolongum</i> |                                  |                                    |
| Chlamydia          | ↑ <i>Borrelia burgdorferi</i>         |                                       |                                  |                                    |
|                    | ↑ <i>Treponema pallidum</i>           |                                       |                                  |                                    |
| Enterobacteriaceae | ↑ <i>Chlamydia pneumoniae</i>         | ↑ <i>Enterobacteriaceae</i>           |                                  |                                    |
| Verrucomicrobia    |                                       |                                       | ↑ <i>Akkermansia muciniphila</i> |                                    |
| Cyanobacteria      |                                       |                                       | ↑ <i>Cyanobacteria</i>           |                                    |
